# Supplementary material
Source: HighWire-hosted journal article supplement (https://cmaj.ca/highwire/filestream/59543/field_highwire_adjunct_files/9/150901-res-7-at.pdf)

**Appendix 7 (as supplied by the authors):** Flow diagram of cohort selection

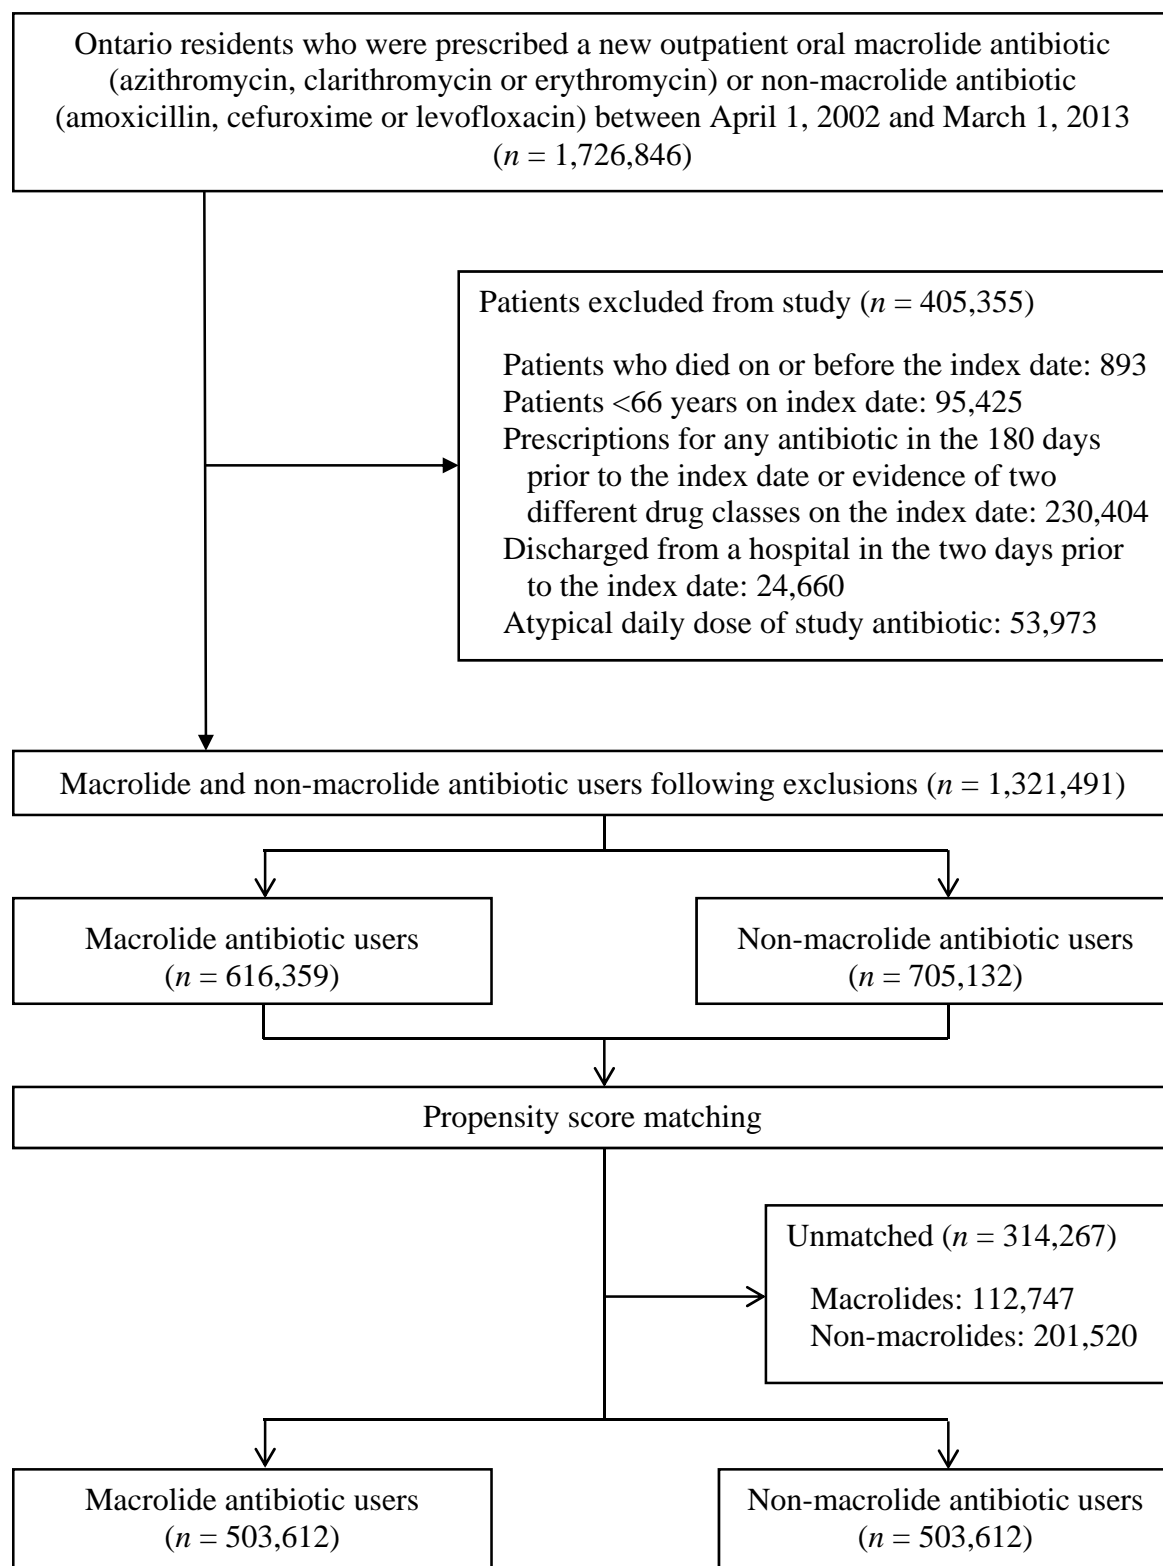

Supplement: 150901-res-7-at.pdf [file 150901-res-7-at.pdf]
